# Supplementary material for: Medications and the Risk of Colorectal Cancer in Patients with Inflammatory Bowel Diseases: Use of the Landmark Method
Source: PubMed Central journal article supplement — Yonsei Med J. 2021 Oct 18;62(11):997–1004. doi: 10.3349/ymj.2021.62.11.997 (PMC8542472; doi:10.3349/ymj.2021.62.11.997), 2021-10-18
Supplement: ymj-62-997-s001.pdf [file ymj-62-997-s001.pdf]

**Supplementary Table 1. Main Ingredient Codes for the Study Drugs**

| <b>Drug</b>                                | <b>Main ingredient code</b>                                                                                                                                                                                                                                                                                                                                                          |
|--------------------------------------------|--------------------------------------------------------------------------------------------------------------------------------------------------------------------------------------------------------------------------------------------------------------------------------------------------------------------------------------------------------------------------------------|
| 5-aminosalicylic acid                      | 119406ACH, 190801ATB, 190802AGN, 190802ATR, 190803ATR, 190805AGN, 190808ATE, 190808ATM, 190808ATR, 190809ATE, 190809ATM, 190809ATR, 190810CEN, 190811ATR, 190802CLO, 190802CSP, 190803CSP, 190804CSP, 190806CLO, 190807CLO, 190831CLO, 190833CLO                                                                                                                                     |
| Immunomodulator                            | 112401ATB, 190601ATB, 192101ATB, 192102BIJ, 192103BIJ, 192104BIJ, 192105BIJ, 192139BIJ, 192141BIJ, 192142BIJ, 192143BIJ                                                                                                                                                                                                                                                              |
| Anti-tumor necrosis factor- $\alpha$ agent | 383501BIJ, 488401BIJ                                                                                                                                                                                                                                                                                                                                                                 |
| Corticosteroid                             | 116401ATB, 140801ATB, 141901ATB, 141903ATB, 141904ATB, 160201ATB, 170901ATB, 170906ATB, 193302ATB, 193305ATB, 217034ASY, 217030ASY, 217035ASY, 217001ATB, 243201ATB, 243202ATB, 243203ATB, 296900ATB, 116530BIJ, 142030BIJ, 142230BIJ, 142232BIJ, 171201BIJ, 171202BIJ, 193530BIJ, 193531BIJ, 193601BIJ, 193602BIJ, 193603BIJ, 193604BIJ, 217302BIJ, 243336BIJ, 243335BIJ, 243337BIJ |
