# Supplementary material for: Medications and the Risk of Colorectal Cancer in Patients with Inflammatory Bowel Diseases: Use of the Landmark Method
Source: PubMed Central journal article supplement — Yonsei Med J. 2021 Oct 18;62(11):997–1004. doi: 10.3349/ymj.2021.62.11.997 (PMC8542472; doi:10.3349/ymj.2021.62.11.997), 2021-10-18
Supplement: ymj-62-997-s002.pdf [file ymj-62-997-s002.pdf]

**Supplementary Table 2.** Cox Proportional Hazards Model Results

| Drug                  | Exposure | CD                |      |                  |         | UC                |       |                  |         |
|-----------------------|----------|-------------------|------|------------------|---------|-------------------|-------|------------------|---------|
|                       |          | Colorectal cancer |      | HR (95% CI)      | p value | Colorectal cancer |       | HR (95% CI)      | p value |
|                       |          | Yes               | No   |                  |         | Yes               | No    |                  |         |
| 5-aminosalicylic acid | No       | 3                 | 105  | ref              | 0.0767  | 9                 | 173   | ref              | <0.001  |
|                       | Yes      | 68                | 6276 | 0.35 (0.11–1.12) |         | 142               | 16445 | 0.18 (0.09–0.35) |         |
| Immunomodulator       | No       | 40                | 2422 | ref              | 0.0034  | 131               | 13769 | ref              | 0.426   |
|                       | Yes      | 31                | 3959 | 0.47 (0.28–0.78) |         | 20                | 2849  | 0.83 (0.51–1.33) |         |
| Corticosteroid        | No       | 25                | 2171 | ref              | 0.9907  | 84                | 8654  | ref              | 0.539   |
|                       | Yes      | 46                | 4210 | 1.00 (0.61–1.66) |         | 67                | 7964  | 0.90 (0.66–1.25) |         |

CD, crohn's disease; UC, ulcerative colitis; HR, hazard ratio; CI, confidence interval.
