# Supplementary material for: Medications and the Risk of Colorectal Cancer in Patients with Inflammatory Bowel Diseases: Use of the Landmark Method
Source: PubMed Central journal article supplement — Yonsei Med J. 2021 Oct 18;62(11):997–1004. doi: 10.3349/ymj.2021.62.11.997 (PMC8542472; doi:10.3349/ymj.2021.62.11.997), 2021-10-18
Supplement: ymj-62-997-s003.pdf [file ymj-62-997-s003.pdf]

**Supplementary Table 3.** Descriptive Statistics on the Number of Cumulative Prescription Days

| Descriptive statistics | CD              | UC                    |
|------------------------|-----------------|-----------------------|
|                        | Immunomodulator | 5-aminosalicylic acid |
| N                      | 3990            | 16587                 |
| Mean                   | 1962.35         | 1874.97               |
| Standard deviation     | 1493.28         | 2019.61               |
| Q1                     | 643             | 192                   |
| Q2                     | 1748.5          | 1139                  |
| Q3                     | 3028            | 3072                  |

CD, crohn's disease; UC, ulcerative colitis.
