# Supplementary material for: Medications and the Risk of Colorectal Cancer in Patients with Inflammatory Bowel Diseases: Use of the Landmark Method
Source: PubMed Central journal article supplement — Yonsei Med J. 2021 Oct 18;62(11):997–1004. doi: 10.3349/ymj.2021.62.11.997 (PMC8542472; doi:10.3349/ymj.2021.62.11.997), 2021-10-18
Supplement: ymj-62-997-s004.pdf [file ymj-62-997-s004.pdf]

**Supplementary Table 4.** Patient Rates according to First Date of Prescription

| Drug                  | Crohn's disease    |                 |                 |               |                |                |
|-----------------------|--------------------|-----------------|-----------------|---------------|----------------|----------------|
|                       | Within 1 month     | Within 2 months | Within 6 months | Within 1 year | Within 2 years | Within 3 years |
| Immunomodulator       | 20.63              | 28.40           | 44.64           | 57.49         | 71.43          | 79.85          |
| Drug                  | Ulcerative colitis |                 |                 |               |                |                |
|                       | Within 1 month     | Within 2 months | Within 6 months | Within 1 year | Within 2 years | Within 3 years |
| 5-aminosalicylic acid | 86.86              | 89.29           | 92.80           | 95.04         | 97.35          | 98.55          |

Data are presented as %.
