# Supplementary figures and images for: Medications and the Risk of Colorectal Cancer in Patients with Inflammatory Bowel Diseases: Use of the Landmark Method
Source: PubMed Central journal article supplement — Yonsei Med J. 2021 Oct 18;62(11):997–1004. doi: 10.3349/ymj.2021.62.11.997 (PMC8542472; doi:10.3349/ymj.2021.62.11.997), 2021-10-18

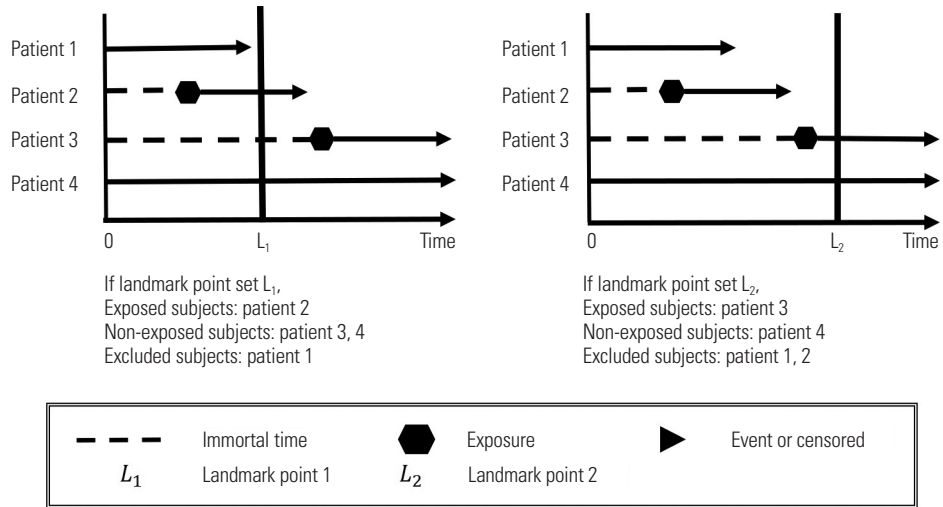

**Supplementary Fig. 1.** Immortal time bias examples.

Supplement: ymj-62-997-s005.pdf [file ymj-62-997-s005.pdf]
